# Supplementary material for: Reflectance Measurements from Aerial and Proximal Sensors Provide Similar Precision in Predicting the Rice Yield Response to Mid-Season N Applications
Source: MDPI journal article supplement (doi:10.3390/s23136218), 2023-07-07
Supplement: s1 [file s1]

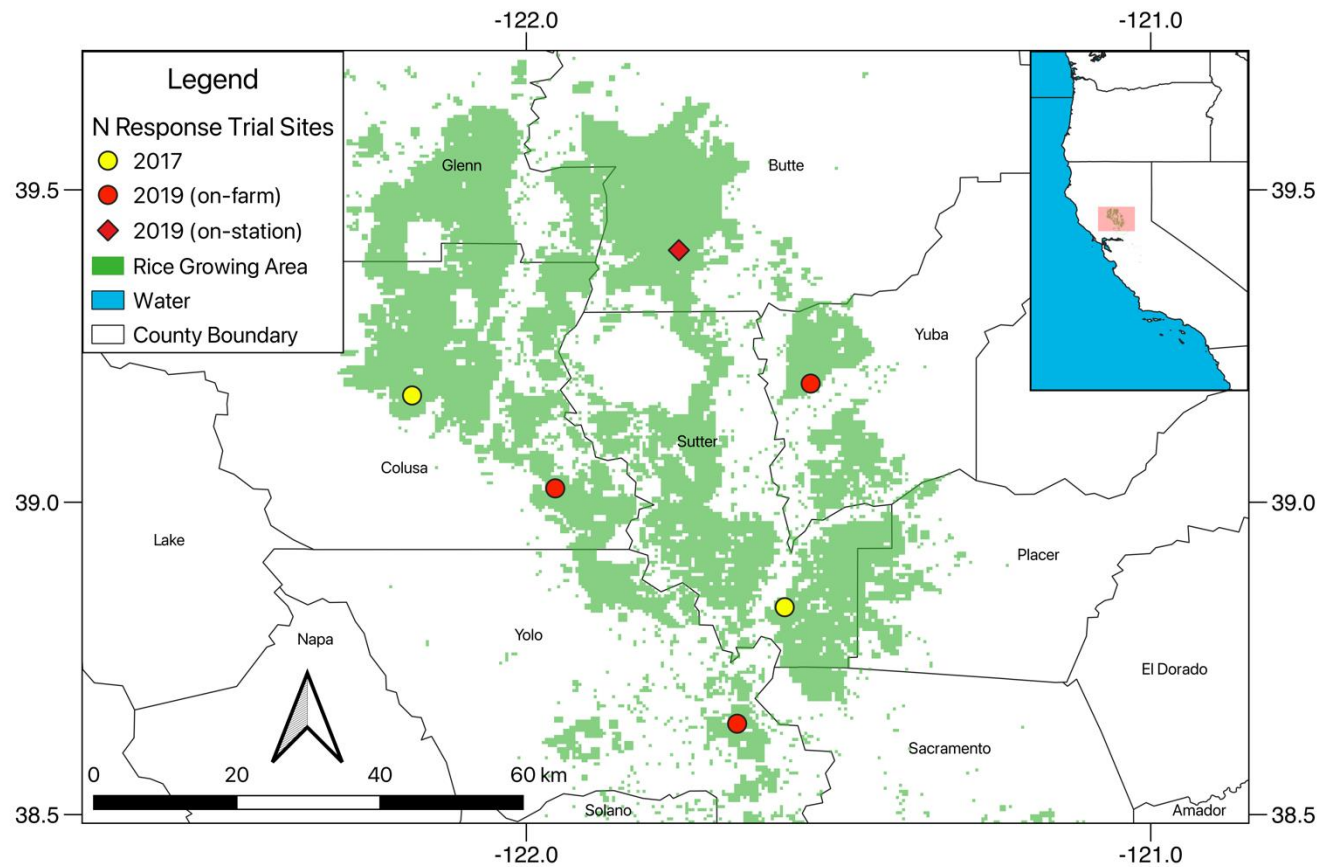

**Figure S1.** A map of N response trial sites established during the 2017 and 2019 growing seasons in the Sacramento Valley rice growing area of California, USA.

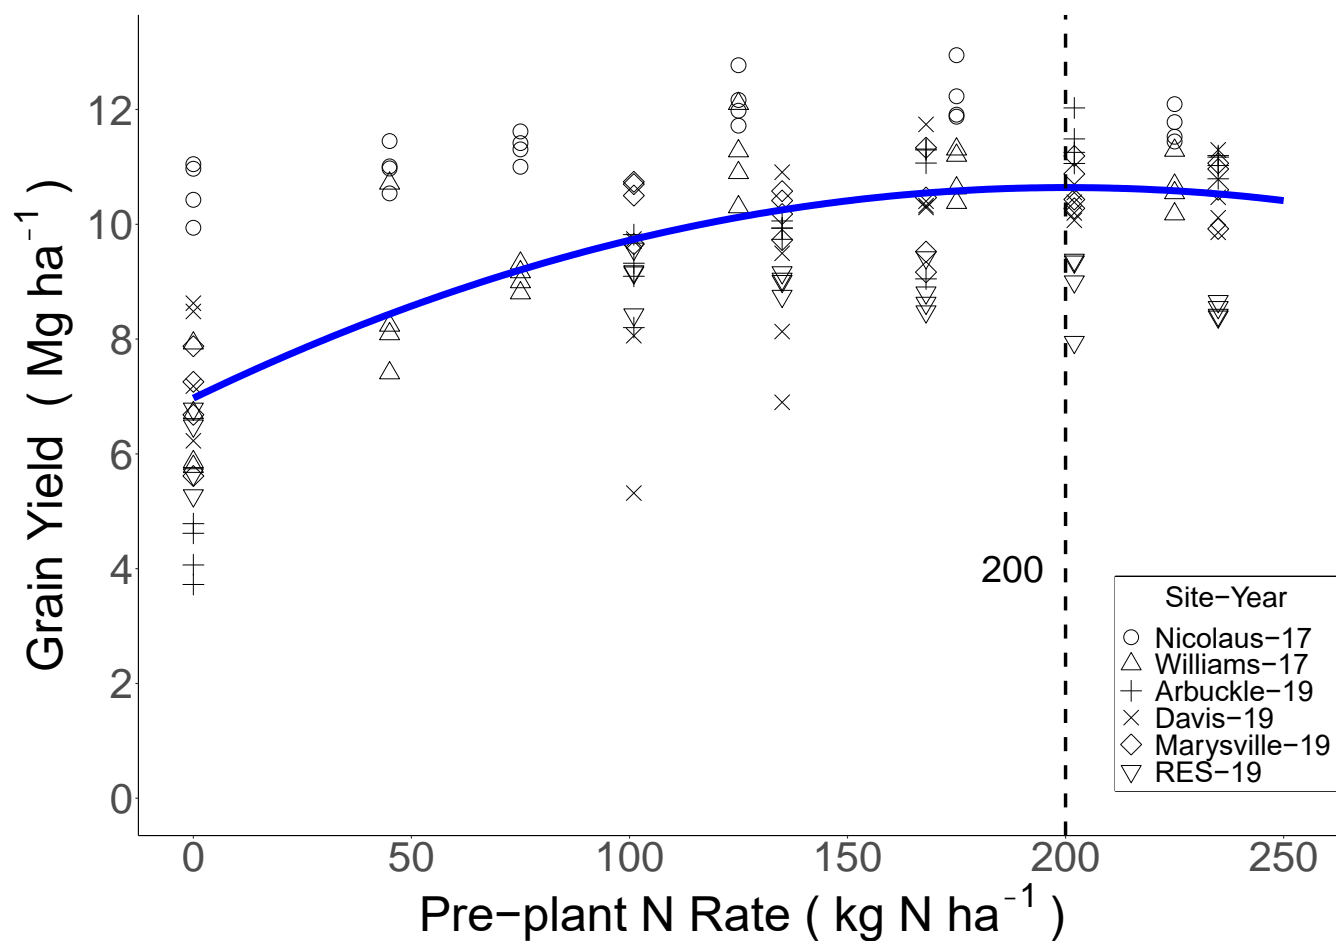

**Figure S2.** The relationship between pre-plant N rate and rice grain yield without top-dress N as described by a quadratic linear mixed-effects model. The vertical dashed line at 200 kg N ha<sup>-1</sup> represents the optimal pre-plant N rate all sites (i.e. the N rate required to achieve maximum yields on average).

**Table S1.** Soil descriptions and selected properties of each N response trial site-year located throughout the Sacramento Valley, California.

| Site-Year     | Soil Series     | Taxonomic Classification                                             | Texture (%) |      |      | Organic Carbon<br>(g kg <sup>-1</sup> ) | Total Nitrogen<br>(g kg <sup>-1</sup> ) | pH  |
|---------------|-----------------|----------------------------------------------------------------------|-------------|------|------|-----------------------------------------|-----------------------------------------|-----|
|               |                 |                                                                      | Sand        | Silt | Clay |                                         |                                         |     |
| Nicolaus-17   | Capay           | Fine, smectitic, thermic Typic Haploxererts                          | 19          | 36   | 45   | 15.1                                    | 1.2                                     | 5.5 |
| Williams-17   | Willows         | Fine, smectitic, thermic Sodic Endoaquerts                           | 21          | 39   | 40   | 17.5                                    | 1.5                                     | 5.0 |
| Arbuckle-19   | Clear Lake      | Fine, smectitic, thermic Xeric Endoaquerts                           | 8           | 38   | 55   | 19.9                                    | 1.6                                     | 6.3 |
| Davis-19      | Sycamore        | Fine-silty, mixed, super active, nonacid, thermic Mollic Endoaquepts | 9           | 38   | 53   | 19.8                                    | 1.8                                     | 6.3 |
| Marysville-19 | San Joaquin     | Fine, mixed, active, thermic Abruptic Durixeralfs                    | 35          | 41   | 24   | 15.4                                    | 1.2                                     | 4.7 |
| RES-19        | Esquon-Neerdobe | Fine, smectitic, thermic Xeric Epiaquerts                            | 30          | 26   | 44   | 13.8                                    | 1.1                                     | 5.3 |

**Table S2.** Descriptive statistics (minimum, maximum, and mean) of GreenSeeker (GS) Normalized Difference Vegetation Index (NDVI<sub>GS</sub>) and unmanned aerial system (UAS) Normalized Difference Red-Edge Index (NDRE<sub>UAS</sub>) vegetation index and Sufficiency-Index measured at the panicle initiation rice growth stage from N response trial sites established during the 2017 growing season.

| Vegetation Index                                |                    |      |             |      |                     |      |             |      |
|-------------------------------------------------|--------------------|------|-------------|------|---------------------|------|-------------|------|
| Pre-plant<br>N rate<br>(kg N ha <sup>-1</sup> ) | NDVI <sub>GS</sub> |      |             |      | NDRE <sub>UAS</sub> |      |             |      |
|                                                 | Nicolaus-17        |      | Williams-17 |      | Nicolaus-17         |      | Williams-17 |      |
|                                                 | min – max          | mean | min – max   | mean | min – max           | mean | min – max   | mean |
| <b>0</b>                                        | 0.49 – 0.52        | 0.51 | 0.36 – 0.45 | 0.41 | 0.54 – 0.61         | 0.58 | 0.49 – 0.58 | 0.54 |
| <b>45</b>                                       | 0.61 – 0.68        | 0.64 | 0.69 – 0.72 | 0.70 | 0.65 – 0.67         | 0.66 | 0.63 – 0.69 | 0.65 |
| <b>75</b>                                       | 0.57 – 0.72        | 0.66 | 0.67 – 0.77 | 0.70 | 0.67 – 0.72         | 0.69 | 0.69 – 0.71 | 0.70 |
| <b>125</b>                                      | 0.66 – 0.68        | 0.67 | 0.67 – 0.79 | 0.74 | 0.73 – 0.74         | 0.73 | 0.72 – 0.76 | 0.74 |
| <b>175</b>                                      | 0.71 – 0.79        | 0.75 | 0.77 – 0.81 | 0.80 | 0.75 – 0.76         | 0.76 | 0.76 – 0.78 | 0.77 |
| <b>225</b>                                      | 0.78 – 0.79        | 0.79 | 0.77 – 0.82 | 0.79 | 0.75 – 0.78         | 0.76 | 0.77 – 0.79 | 0.78 |
| <b>All</b>                                      | 0.49 – 0.79        | 0.67 | 0.36 – 0.82 | 0.69 | 0.54 – 0.78         | 0.70 | 0.49 – 0.79 | 0.70 |

  

| Sufficiency-Index                               |                    |      |             |      |                     |      |             |      |
|-------------------------------------------------|--------------------|------|-------------|------|---------------------|------|-------------|------|
| Pre-plant<br>N rate<br>(kg N ha <sup>-1</sup> ) | NDVI <sub>GS</sub> |      |             |      | NDRE <sub>UAS</sub> |      |             |      |
|                                                 | Nicolaus-17        |      | Williams-17 |      | Nicolaus-17         |      | Williams-17 |      |
|                                                 | min – max          | mean | min – max   | mean | min – max           | mean | min – max   | mean |
| <b>0</b>                                        | 0.62 – 0.65        | 0.64 | 0.44 – 0.56 | 0.50 | 0.71 – 0.80         | 0.76 | 0.63 – 0.74 | 0.69 |
| <b>45</b>                                       | 0.78 – 0.87        | 0.82 | 0.86 – 0.89 | 0.87 | 0.86 – 0.88         | 0.87 | 0.81 – 0.89 | 0.84 |
| <b>75</b>                                       | 0.73 – 0.91        | 0.83 | 0.83 – 0.95 | 0.86 | 0.88 – 0.94         | 0.90 | 0.89 – 0.91 | 0.89 |
| <b>125</b>                                      | 0.84 – 0.87        | 0.85 | 0.82 – 0.98 | 0.92 | 0.95 – 0.97         | 0.96 | 0.92 – 0.97 | 0.95 |
| <b>175</b>                                      | 0.90 – 1.00        | 0.95 | 0.96 – 0.99 | 0.98 | 0.98 – 0.99         | 0.99 | 0.97 – 0.99 | 0.98 |
| <b>225</b>                                      | 0.98 – 1.00        | 1.00 | 0.96 – 1.01 | 0.98 | 0.99 – 1.02         | 1.00 | 0.98 – 1.01 | 1.00 |
| <b>All</b>                                      | 0.62 – 1.00        | 0.85 | 0.44 – 1.01 | 0.85 | 0.71 – 1.02         | 0.91 | 0.63 – 1.01 | 0.89 |

**Table S3.** Descriptive statistics (minimum, maximum, and mean) of GreenSeeker (GS) Normalized Difference Vegetative Index (NDVI<sub>GS</sub>) vegetation index (VI) and Sufficiency-Index (SI) measured at the panicle initiation rice growth stage from N response trial sites established during the 2019 growing season.

| NDVI <sub>GS</sub>                              |             |      |             |      |               |      |             |      |
|-------------------------------------------------|-------------|------|-------------|------|---------------|------|-------------|------|
| Vegetation Index                                |             |      |             |      |               |      |             |      |
| Pre-plant<br>N rate<br>(kg N ha <sup>-1</sup> ) | Arbuckle-19 |      | Davis-19    |      | Marysville-19 |      | RES-19      |      |
|                                                 | min – max   | mean | min – max   | mean | min – max     | mean | min – max   | mean |
| <b>0</b>                                        | 0.18 – 0.28 | 0.23 | 0.38 – 0.51 | 0.47 | 0.45 – 0.52   | 0.48 | 0.31 – 0.43 | 0.37 |
| <b>101</b>                                      | 0.58 – 0.60 | 0.59 | 0.38 – 0.55 | 0.48 | 0.68 – 0.69   | 0.68 | 0.60 – 0.66 | 0.63 |
| <b>135</b>                                      | 0.61 – 0.66 | 0.64 | 0.56 – 0.59 | 0.57 | 0.70 – 0.71   | 0.70 | 0.60 – 0.70 | 0.66 |
| <b>168</b>                                      | 0.62 – 0.72 | 0.68 | 0.51 – 0.67 | 0.58 | 0.72 – 0.75   | 0.73 | 0.53 – 0.69 | 0.63 |
| <b>202</b>                                      | 0.65 – 0.73 | 0.70 | 0.56 – 0.70 | 0.62 | 0.72 – 0.75   | 0.74 | 0.58 – 0.72 | 0.68 |
| <b>235</b>                                      | 0.68 – 0.75 | 0.72 | 0.59 – 0.64 | 0.61 | 0.73 – 0.76   | 0.75 | 0.61 – 0.75 | 0.67 |
| <b>All</b>                                      | 0.18 – 0.75 | 0.59 | 0.38 – 0.70 | 0.55 | 0.45 – 0.76   | 0.68 | 0.31 – 0.75 | 0.61 |
| Sufficiency-Index                               |             |      |             |      |               |      |             |      |
| Pre-plant<br>N rate<br>(kg N ha <sup>-1</sup> ) | Arbuckle-19 |      | Davis-19    |      | Marysville-19 |      | RES-19      |      |
|                                                 | min – max   | mean | min – max   | mean | min – max     | mean | min – max   | mean |
| <b>0</b>                                        | 0.25 – 0.38 | 0.32 | 0.58 – 0.77 | 0.70 | 0.59 – 0.69   | 0.63 | 0.43 – 0.59 | 0.52 |
| <b>101</b>                                      | 0.79 – 0.83 | 0.80 | 0.57 – 0.84 | 0.72 | 0.90 – 0.92   | 0.91 | 0.84 – 0.92 | 0.88 |
| <b>135</b>                                      | 0.83 – 0.91 | 0.87 | 0.84 – 0.89 | 0.86 | 0.92 – 0.95   | 0.94 | 0.84 – 0.98 | 0.93 |
| <b>168</b>                                      | 0.84 – 0.98 | 0.93 | 0.77 – 1.01 | 0.88 | 0.95 – 1.00   | 0.97 | 0.74 – 0.97 | 0.88 |
| <b>202</b>                                      | 0.89 – 0.99 | 0.95 | 0.85 – 1.05 | 0.93 | 0.95 – 1.00   | 0.99 | 0.82 – 1.00 | 0.95 |
| <b>235</b>                                      | 0.93 – 1.02 | 0.98 | 0.89 – 0.96 | 0.92 | 0.97 – 1.00   | 0.99 | 0.85 – 1.05 | 0.93 |
| <b>All</b>                                      | 0.25 – 1.02 | 0.81 | 0.57 – 1.05 | 0.83 | 0.59 – 1.00   | 0.90 | 0.43 – 1.05 | 0.85 |

**Table S4.** Descriptive statistics (minimum, maximum, and mean) of unmanned aerial system (UAS) Normalized Difference Red-Edge Index (NDRE<sub>UAS</sub>) vegetation index (VI) and Sufficiency-Index (SI) measured at the panicle initiation rice growth stage from N response trial sites established during the 2019 growing season.

| NDRE <sub>UAS</sub>                             |             |      |             |      |               |      |             |      |
|-------------------------------------------------|-------------|------|-------------|------|---------------|------|-------------|------|
| Vegetation Index                                |             |      |             |      |               |      |             |      |
| Pre-plant<br>N rate<br>(kg N ha <sup>-1</sup> ) | Arbuckle-19 |      | Davis-19    |      | Marysville-19 |      | RES-19      |      |
|                                                 | min – max   | mean | min – max   | mean | min – max     | mean | min – max   | mean |
| <b>0</b>                                        | 0.33 – 0.35 | 0.35 | 0.31 – 0.39 | 0.34 | 0.35 – 0.42   | 0.39 | 0.43 – 0.46 | 0.45 |
| <b>101</b>                                      | 0.49 – 0.53 | 0.52 | 0.40 – 0.42 | 0.41 | 0.55 – 0.59   | 0.57 | 0.53 – 0.58 | 0.56 |
| <b>135</b>                                      | 0.54 – 0.58 | 0.57 | 0.37 – 0.48 | 0.44 | 0.59 – 0.61   | 0.60 | 0.49 – 0.62 | 0.57 |
| <b>168</b>                                      | 0.57 – 0.61 | 0.59 | 0.45 – 0.53 | 0.48 | 0.58 – 0.64   | 0.62 | 0.55 – 0.63 | 0.59 |
| <b>202</b>                                      | 0.59 – 0.62 | 0.61 | 0.41 – 0.54 | 0.48 | 0.62 – 0.66   | 0.64 | 0.54 – 0.64 | 0.60 |
| <b>235</b>                                      | 0.60 – 0.65 | 0.63 | 0.47 – 0.52 | 0.50 | 0.64 – 0.67   | 0.66 | 0.53 – 0.66 | 0.59 |
| <b>All</b>                                      | 0.33 – 0.65 | 0.54 | 0.31 – 0.54 | 0.44 | 0.35 – 0.67   | 0.58 | 0.43 – 0.66 | 0.56 |
| Sufficiency-Index                               |             |      |             |      |               |      |             |      |
| Pre-plant<br>N rate<br>(kg N ha <sup>-1</sup> ) | Arbuckle-19 |      | Davis-19    |      | Marysville-19 |      | RES-19      |      |
|                                                 | min – max   | mean | min – max   | mean | min – max     | mean | min – max   | mean |
| <b>0</b>                                        | 0.52 – 0.55 | 0.54 | 0.59 – 0.73 | 0.64 | 0.53 – 0.64   | 0.59 | 0.67 – 0.73 | 0.70 |
| <b>101</b>                                      | 0.77 – 0.83 | 0.81 | 0.74 – 0.80 | 0.78 | 0.84 – 0.89   | 0.86 | 0.83 – 0.91 | 0.88 |
| <b>135</b>                                      | 0.85 – 0.91 | 0.88 | 0.70 – 0.90 | 0.82 | 0.89 – 0.93   | 0.91 | 0.77 – 0.98 | 0.89 |
| <b>168</b>                                      | 0.90 – 0.96 | 0.93 | 0.85 – 1.00 | 0.91 | 0.88 – 0.98   | 0.94 | 0.86 – 0.99 | 0.92 |
| <b>202</b>                                      | 0.92 – 0.97 | 0.95 | 0.78 – 1.01 | 0.91 | 0.94 – 0.99   | 0.98 | 0.84 – 1.00 | 0.93 |
| <b>235</b>                                      | 0.94 – 1.01 | 0.98 | 0.89 – 0.98 | 0.94 | 0.96 – 1.01   | 0.99 | 0.83 – 1.03 | 0.93 |
| <b>All</b>                                      | 0.52 – 1.01 | 0.85 | 0.59 – 1.01 | 0.83 | 0.53 – 1.01   | 0.88 | 0.67 – 1.03 | 0.88 |
